# Supplementary material for: Exploring polymorphism, stoichiometric diversity and simultaneous existence of salt and cocrystal during cocrystallization using mechanochemistry
Source: Royal Society of Chemistry journal article supplement (doi:10.1039/d3mr00022b), 2024-01-01
Supplement: d3mr00022b1.pdf [file d3mr00022b1.pdf]

## **Electronic Supporting Information**

### **Exploring Polymorphism, Stoichiometric Diversity and Simultaneous Existence of Salt and Cocrystal During Cocrystallization Using Mechanochemistry**

Diptajyoti Gogoi,<sup>1</sup> Kalyan J. Kalita,<sup>2</sup> Nishant Biswakarma,<sup>3</sup> Mihails Arhangeliskis,<sup>4</sup> Ramesh Ch Deka\*,<sup>3</sup> and Ranjit Thakuria\*,<sup>1</sup>

<sup>1</sup> Department of Chemistry, Gauhati University, Guwahati 781014, India

<sup>2</sup> Department of Chemical Sciences, Indian Institute of Science Education and Research Kolkata, 741246, West Bengal, India

<sup>3</sup> Department of Chemical Sciences, Tezpur University, Tezpur, Assam, India

<sup>4</sup> Faculty of Chemistry, University of Warsaw, 1 Pasteura Street, 02-093 Warsaw, Poland.

#### **Table of Contents**

- 1. CSD survey and crystallographic parameters of all the TACA-NA-H<sub>2</sub>O multicomponent solids.**
- 2. Hydrogen bond parameters and characterization of all the TACA-NA-H<sub>2</sub>O multicomponent solids.**
- 3. PXRDs of all the TACA-NA-H<sub>2</sub>O multicomponent solids in turnover experiments**
- 4. Theoretical calculations**
- 5. Optimized coordinates of the structures**

#### **1. Cambridge Crystallographic Database (CSD) Survey**

The CSD search has been conducted using ConQuest Version 5.13. In the software, there is a polymorphic subset with 39,741 hits. Only crystal structures containing the keyword “polymorph” (*i.e.* the compound was described in the literature as being polymorphic) were kept.

Additional filters which were used:

- 3D coordinates determined;
- no ions;

- no powder structures;
- not polymeric;

from this search, we got 15,770 hits. Out of which 269 are cocrystals including 6 cocrystals hydrate and only 5 cocrystal hydrates are reported which have report on polymorphs.

**Table S1:** list of so far reported cocrystals hydrate.

| S.No. | REFERENCE/DOI                                                                                                                                                                          | Refcode             | Z''  |
|-------|----------------------------------------------------------------------------------------------------------------------------------------------------------------------------------------|---------------------|------|
| 1.    | C.Fiore, A.Baraghini, O.Shemchuk, V.Sambri, M.Morotti, F.Grepioni, D.Braga, <i>Cryst.Growth Des.</i> , <b>2022</b> , 22, 1467<br>(10.1021/acs.cgd.1c01435)                             | QANXAI,<br>QANXAI01 | 9, 9 |
| 2.    | S.Aitipamula, A.B.H.Wong, Pui Shan Chow, R.B.H.Tan, <i>CrystEngComm</i> , <b>2013</b> , 15, 5877<br>(10.1039/C3CE40729B)                                                               | BICQUB, BICQUB01    | 3, 6 |
| 3.    | M.V.Sosa-Rivadeneira, P.Venkatesan, F.Flores-Manuel, S.Bernes, H.Hopfl, M.Ceron, S.Thamotharan, M.Judith Percino, <i>CrystEngComm</i> , <b>2020</b> , 22, 6645<br>(10.1039/D0CE01056A) | CUWPES,<br>CUWPES01 | 3, 3 |
| 4.    | M.K.Chantooni Junior, D.Britton, I.M.Kolthoff, <i>J.Crystallogr.Spectrosc.Res.</i> , <b>1993</b> , 23, 497<br>(10.1007/BF01182526)                                                     | YAXCEF,<br>YAXCEF01 | 5, 5 |
| 5.    | B. Zhou, Q. Zhao, L. Tang, D. Yan, <i>Chem.Commun.</i> , <b>2020</b> , 56, 7698<br>(10.1039/D0CC02730H)                                                                                | ZUSPIP, ZUSPIP01    | 4, 8 |

**Table S2.** Crystallographic parameters of the TACA-NA multicomponent solids

| Compound name    | TACA•NA molecular salt monohydrate (1:1:1) | TACA•NA molecular salt monohydrate (1:1:1) | TACA•NA cocrystal monohydrate (2:4:1) Form I  | TACA•NA cocrystal monohydrate (2:4:1) Form II |
|------------------|--------------------------------------------|--------------------------------------------|-----------------------------------------------|-----------------------------------------------|
| Chemical formula | $C_6H_5O_6 \cdot C_6H_7N_2O \cdot H_2O$    | $C_6H_5O_6 \cdot C_6H_7N_2O \cdot H_2O$    | $2(C_6H_6O_6) \cdot 4(C_6H_6N_2O) \cdot H_2O$ | $2(C_6H_6O_6) \cdot 4(C_6H_6N_2O) \cdot H_2O$ |
| $M_r$            | 314.25                                     | 314.25                                     | 854.74                                        | 854.74                                        |
| Crystal system   | Monoclinic                                 | Monoclinic                                 | Triclinic                                     | Triclinic                                     |

|                                                                          |                                                   |                                                                                    |                                                   |                                                   |
|--------------------------------------------------------------------------|---------------------------------------------------|------------------------------------------------------------------------------------|---------------------------------------------------|---------------------------------------------------|
| Space group                                                              | <i>Cc</i>                                         | <i>Cc</i>                                                                          | <i>P</i> $\bar{1}$                                | <i>P</i> $\bar{1}$                                |
| Temperature (K)                                                          | 296                                               | 100                                                                                | 296                                               | 296                                               |
| <i>a</i> (Å)                                                             | 12.9786 (15)                                      | 12.8183(3)                                                                         | 5.0306 (9)                                        | 5.0668 (7)                                        |
| <i>b</i> (Å)                                                             | 5.1427 (6)                                        | 5.1324(2)                                                                          | 14.977 (3)                                        | 17.993 (3)                                        |
| <i>c</i> (Å)                                                             | 20.843 (3)                                        | 20.7423(6)                                                                         | 26.812 (5)                                        | 22.139 (3)                                        |
| $\alpha$ (°)                                                             | 90                                                | 90                                                                                 | 84.727 (5)                                        | 92.134 (5)                                        |
| $\beta$ (°)                                                              | 102.570 (3)                                       | 103.769(3)                                                                         | 87.615 (5)                                        | 93.962 (4)                                        |
| $\gamma$ (°)                                                             | 90                                                | 90                                                                                 | 87.464 (5)                                        | 94.232 (4)                                        |
| <i>V</i> (Å <sup>3</sup> )                                               | 1357.8 (3)                                        | 1325.39(7)                                                                         | 2008.2 (6)                                        | 2006.2 (5)                                        |
| <i>Z</i>                                                                 | 4                                                 | 4                                                                                  | 2                                                 | 2                                                 |
| Radiation type                                                           | Mo <i>K</i> $\alpha$                              | Cu <i>K</i> $\alpha$                                                               | Mo <i>K</i> $\alpha$                              | Mo <i>K</i> $\alpha$                              |
| $\mu$ (mm <sup>-1</sup> )                                                | 0.13                                              | 1.17                                                                               | 0.11                                              | 0.11                                              |
| Density (g cm <sup>-3</sup> )                                            | 1.537                                             | 1.575                                                                              | 1.414                                             | 1.415                                             |
| Diffractometer                                                           | Bruker <i>APEX</i> -II CCD                        | XtaLAB Synergy,<br>Dualflex, HyPix                                                 | Bruker <i>APEX</i> -II CCD                        | Bruker <i>APEX</i> -II CCD                        |
| Absorption correction                                                    | Multi-scan<br>Bruker AXS <i>SADABS</i><br>program | Multi-scan<br>CrysAlis PRO<br>1.171.42.88a (Rigaku<br>Oxford Diffraction,<br>2023) | Multi-scan<br>Bruker AXS <i>SADABS</i><br>program | Multi-scan<br>Bruker AXS <i>SADABS</i><br>program |
| No. of measured reflections                                              | 9970                                              | 3701                                                                               | 60538                                             | 74875                                             |
| No. of independent reflections                                           | 2752                                              | 1920                                                                               | 8337                                              | 10939                                             |
| No. of observed [ <i>I</i> > 2 $\sigma$ ( <i>I</i> )] reflections        | 2665                                              | 1913                                                                               | 5906                                              | 6550                                              |
| <i>R</i> <sub>int</sub>                                                  | 0.022                                             | 0.023                                                                              | 0.063                                             | 0.083                                             |
| (sin $\theta/\lambda$ ) <sub>max</sub> (Å <sup>-1</sup> )                | 0.635                                             | 0.633                                                                              | 0.631                                             | 0.694                                             |
| <i>R</i> [ <i>F</i> <sup>2</sup> > 2 $\sigma$ ( <i>F</i> <sup>2</sup> )] | 0.028                                             | 0.028                                                                              | 0.050                                             | 0.062                                             |
| <i>wR</i> ( <i>F</i> <sup>2</sup> )                                      | 0.069                                             | 0.073                                                                              | 0.151                                             | 0.184                                             |
| <i>S</i>                                                                 | 1.03                                              | 1.05                                                                               | 1.04                                              | 1.02                                              |

|                                                                  |             |             |             |             |
|------------------------------------------------------------------|-------------|-------------|-------------|-------------|
| $\Delta\rho_{\max}, \Delta\rho_{\min}$ (e<br>$\text{\AA}^{-3}$ ) | 0.14, -0.20 | 0.16, -0.17 | 0.53, -0.25 | 0.47, -0.27 |
| CCDC No.                                                         | 2291739     | 2355242     | 2291740     | 2291741     |

**2. Table S3.** Hydrogen bond parameters of the TACA-NA multicomponent solids

| Interaction                                                | D–H (Å) | H···A (Å) | D···A (Å) | D–H···A<br>(degree) | Symmetry code            |
|------------------------------------------------------------|---------|-----------|-----------|---------------------|--------------------------|
| <b>TACA•NA molecular salt monohydrate (1:1:1) at 296 K</b> |         |           |           |                     |                          |
| O4–H4A···O8                                                | 0.813   | 1.780     | 2.591     | 175.58(1)           | x, y, z                  |
| N2–H7A···O6                                                | 0.999   | 1.568     | 2.566     | 175.49(1)           | x, y, z                  |
| N2–H7A···O7                                                | 0.999   | 2.524     | 3.197     | 124.46(1)           | x, y, z                  |
| N1–H1A···O5                                                | 0.879   | 2.082     | 2.942     | 166.02(1)           | x-1/2, +y-1/2, +z        |
| O2–H2A···O1                                                | 0.857   | 1.813     | 2.670     | 178.70(1)           | x+1/2, -y+1/2,<br>+z+1/2 |
| O8–H8B···O3                                                | 0.819   | 2.002     | 2.808     | 167.87(1)           | x+1/2, +y-1/2-1,<br>+z   |
| O8–H8A···O6                                                | 0.869   | 1.895     | 2.755     | 170.58(1)           | x+1/2, +y-1/2, +z        |
| N1–H1B···O7                                                | 0.857   | 1.963     | 2.811     | 170.04(1)           | x-1/2, +y-1/2-1, +z      |
| <b>TACA•NA molecular salt monohydrate (1:1:1) at 100 K</b> |         |           |           |                     |                          |
| N2–H2B···O6                                                | 1.08(3) | 1.47(4)   | 2.552(3)  | 175(4)              | x, y, z                  |
| N2–H2B···O7                                                | 1.08(3) | 2.48(4)   | 3.167(3)  | 120(2)              | x, y, z                  |
| O4–H4A···O8                                                | 0.80(4) | 1.77(4)   | 2.570(3)  | 176(3)              | x, y, z                  |
| N1–H1A···O7                                                | 1.00(4) | 1.78(4)   | 2.774(3)  | 174(3)              | 1/2+x,-3/2+y,z           |
| N1–H1B···O5                                                | 0.91(3) | 2.02(3)   | 2.922(3)  | 170(3)              | 1/2+x,-1/2+y,z           |
| O2–H2A···O1                                                | 0.83(4) | 1.83(4)   | 2.653(3)  | 173(4)              | -1/2+x,1/2-y,-<br>1/2+z  |
| O8–H8B···O3                                                | 0.81(4) | 2.00(4)   | 2.783(3)  | 164(4)              | -1/2+x,-3/2+y,z          |
| O8–H8A···O6                                                | 0.86(4) | 1.86(4)   | 2.720(3)  | 179(6)              | -1/2+x,-1/2+y,z          |
| <b>TACA•NA cocrystal monohydrate (2:4:1) Form I</b>        |         |           |           |                     |                          |
| O11–H11A···N2                                              | 0.985   | 1.651     | 2.629     | 170.97(2)           | x, y, z                  |
| O17–<br>H17B···O12                                         | 0.868   | 1.927     | 2.791     | 173.26(2)           | x, y, z                  |
| N1–H1A···O9                                                | 0.911   | 2.639     | 3.246     | 124.80(2)           | x, y, z                  |

|                                                      |       |       |          |           |                |
|------------------------------------------------------|-------|-------|----------|-----------|----------------|
| N1–H1B···O17                                         | 0.853 | 2.401 | 3.228(1) | 163.43(2) | x, y, z        |
| N3–H3B···O17                                         | 0.861 | 2.230 | 3.053    | 159.89(2) | x, y, z        |
| O16–H16A···N4                                        | 0.946 | 1.667 | 2.612    | 177.54(2) | x+1, +y, +z    |
| O5–H5C···N1                                          | 0.879 | 2.983 | 3.701    | 140.16(2) | x+1, +y, +z    |
| O5–H5C···O1                                          | 0.879 | 1.725 | 2.596    | 170.66(2) | x+1, +y, +z    |
| N7–H7A···O4                                          | 0.920 | 2.254 | 3.147(1) | 163.42(2) | x+1, +y, +z    |
| N3–H3A···O9                                          | 0.936 | 1.965 | 2.879    | 164.91(2) | x+1, +y, +z    |
| O17–<br>H17A···O15                                   | 0.955 | 2.002 | 2.896    | 154.98(2) | x-1, +y, +z    |
| O14–H14A···N6                                        | 0.913 | 1.753 | 2.665    | 176.91(2) | x-1, +y, +z    |
| O10–H10A···O2                                        | 0.909 | 1.713 | 2.616    | 171.64(2) | x-1, +y, +z    |
| O10–H10A···N3                                        | 0.909 | 2.893 | 3.602    | 136.01(2) | x-1, +y, +z    |
| N1–H1A···O6                                          | 0.911 | 2.048 | 2.906    | 156.44(2) | x-1, +y, +z    |
| N7–H7B···O7                                          | 0.857 | 2.133 | 2.971    | 165.52(2) | -x, -y+1, -z+1 |
| N5–H5A···O2                                          | 0.900 | 2.537 | 3.346    | 149.90(2) | x-1, +y+1, +z  |
| O8–H8A···N8                                          | 1.088 | 1.505 | 2.587    | 171.71(2) | x-1, +y-1, +z  |
| N5–H5B···N5                                          | 0.978 | 2.960 | 3.694(1) | 132.72(2) | -x, -y+2, -z+2 |
| N5–H5B···O3                                          | 0.978 | 1.914 | 2.891    | 177.81(2) | -x, -y+2, -z+2 |
| <b>TACA•NA cocrystal monohydrate (2:4:1) Form II</b> |       |       |          |           |                |
| N2–H2B···O17                                         | 0.896 | 2.441 | 3.222    | 145.76(1) | x, y, z        |
| N4–H4A···O5                                          | 0.900 | 2.608 | 3.176    | 121.81(1) | x, y, z        |
| N4–H4B···O17                                         | 0.893 | 2.246 | 3.129    | 169.95(2) | x, y, z        |
| O11–H11C···N3                                        | 0.944 | 1.710 | 2.645    | 170.21(2) | x, y, z        |
| O17–<br>H17B···O12                                   | 0.912 | 1.976 | 2.870    | 166.32(2) | x, y, z        |
| O1–H1A···N7                                          | 1.096 | 1.510 | 2.604    | 174.88(2) | x+1, +y-1, +z  |
| O3–H3A···N4                                          | 1.022 | 2.968 | 3.782    | 137.25(1) | x-1, +y, +z    |
| N6–H6B···O15                                         | 0.943 | 2.124 | 3.047    | 165.59(1) | x-1, +y, +z    |
| N8–H8B···O16                                         | 0.904 | 2.051 | 2.881    | 152.20(1) | x-1, +y, +z    |
| O3–H3A···O14                                         | 1.022 | 1.569 | 2.581    | 169.63(2) | x-1, +y, +z    |
| O10–H10A···N1                                        | 1.009 | 1.638 | 2.644    | 175.48(1) | x-1, +y, +z    |
| N2–H2A···O5                                          | 0.966 | 1.940 | 2.889    | 166.76(2) | x-1, +y, +z    |
| N2–H2B···O13                                         | 0.896 | 2.948 | 3.518    | 123.07(1) | x+1, +y, +z    |
| O7–H7A···N5                                          | 1.043 | 1.622 | 2.662    | 175.67(1) | x+1, +y, +z    |
| N4–H4A···O4                                          | 0.900 | 2.113 | 2.966    | 157.74(1) | x+1, +y, +z    |

|               |       |       |       |           |                |
|---------------|-------|-------|-------|-----------|----------------|
| O6–H6C···N2   | 0.909 | 2.933 | 3.633 | 135.03(2) | x+1, +y, +z    |
| O6–H6C···O13  | 0.909 | 1.755 | 2.659 | 173.18(2) | x+1, +y, +z    |
| O17–H17A···O9 | 0.904 | 2.133 | 2.885 | 140.07(2) | x+1, +y, +z    |
| N6–H6A···O1   | 0.850 | 2.584 | 3.175 | 127.67(1) | x-1, +y+1, +z  |
| N6–H6A···O3   | 0.850 | 2.528 | 3.275 | 147.19(2) | x, +y+1, +z    |
| N8–H8A···O2   | 0.866 | 2.006 | 2.867 | 172.91(1) | -x+1, -y+1, -z |

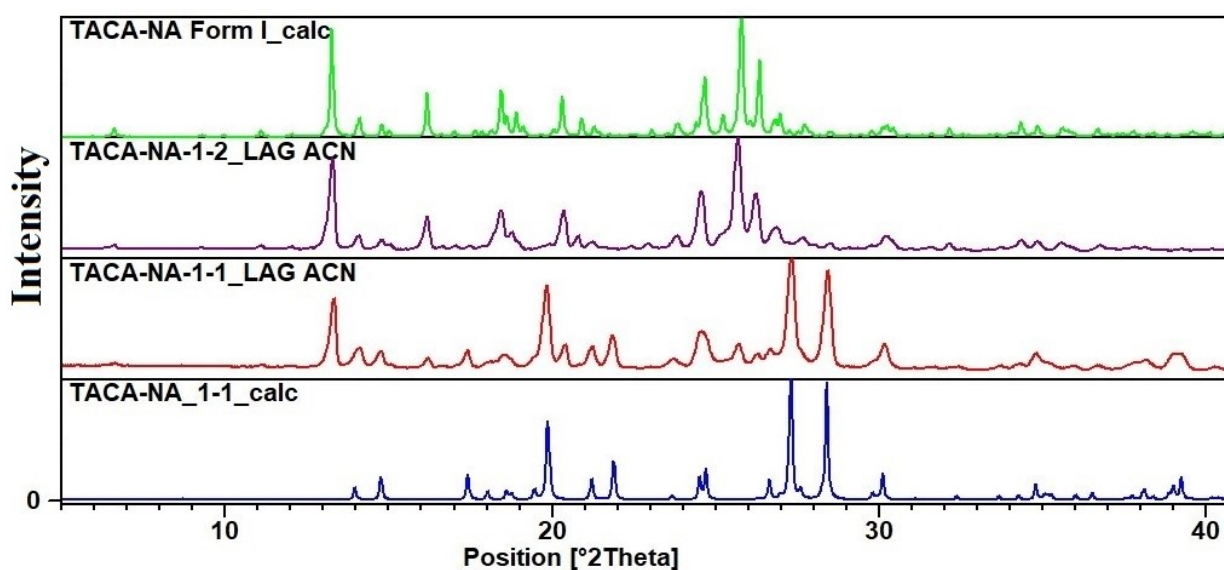

**Figure S1.** Comparison of experimental PXRD patterns of 1:1 and 1:2 TACA-NA mixture with simulated powder patterns of 1:1 (TACA)•(NA)•(H<sub>2</sub>O) salt hydrate and 1:2 (TACA)<sub>2</sub>•(NA)<sub>4</sub>•(H<sub>2</sub>O) Form I.

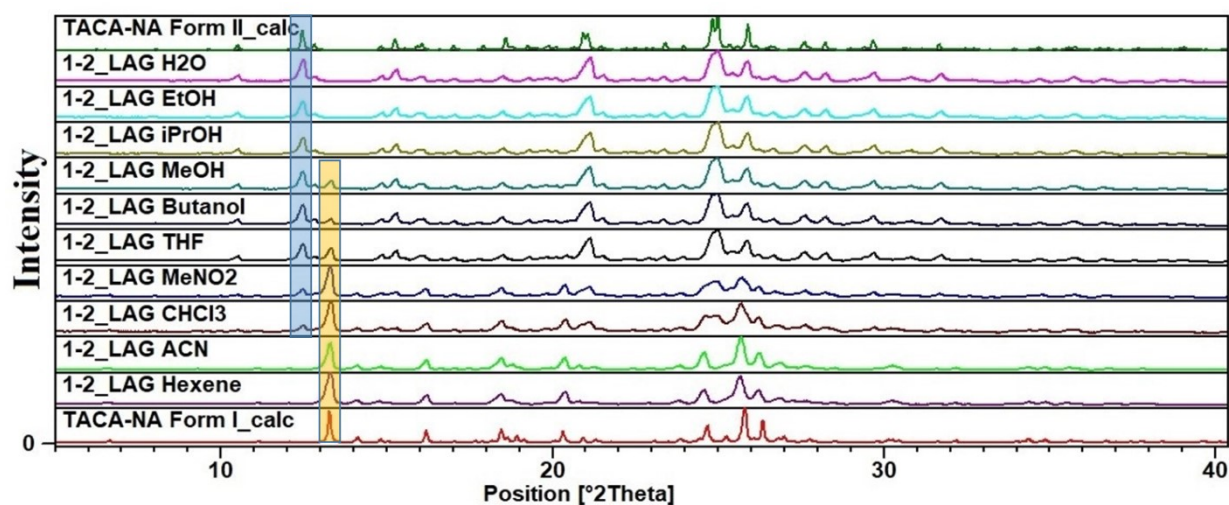

**Figure S2.** Experimental PXRD patterns of 1:2 TACA-NA ground powder in presence of various added liquids. PXRD pattern of (TACA)•(NA)•(H<sub>2</sub>O) salt hydrate ground in presence of various added liquids. Formation of respective polymorphs has been confirmed based on the characteristic peaks of Form I and II highlighted by yellow and blue lines respectively.

For 1:1 (TACA)•(NA)•(H<sub>2</sub>O) salt hydrate, the peak at 3511.11 cm<sup>-1</sup> corresponds to the N-H stretching of the amide group and peak at 3401.63 corresponds to the N-H stretching of the pyridinium ring of nicotinamide.<sup>1</sup> Which implies that a proton is transferred from one of the carboxylic acid groups of TACA to the ring nitrogen of NA. Again, we also observed a shift of wave number from 1708.65 (or 1708.52) cm<sup>-1</sup> for (TACA)<sub>2</sub>•(NA)<sub>4</sub>•(H<sub>2</sub>O) Form I (or Form II) to 1696.74 cm<sup>-1</sup> for 1:1 (TACA)•(NA)•(H<sub>2</sub>O) salt hydrate which corresponds to C=O of carboxylic group of TACA. The shift is observed because of the formation of carboxylate ion after proton transfer. O-H stretching frequency of the carboxylic acid groups of TACA for all the multi-component solids are unique, broad and observed within 2700-3300 cm<sup>-1</sup> well separated from the N-H stretching region. However, it is difficult to conclude, as TACA-NA system has multiple carboxylic acid functions (for TACA) and amide functional groups (for NA) that create difficulty in interpretation of the FT-IR spectra. Therefore, SCXRD analysis would be a better approach to characterize formation of salt vs. cocrystal for similar systems.

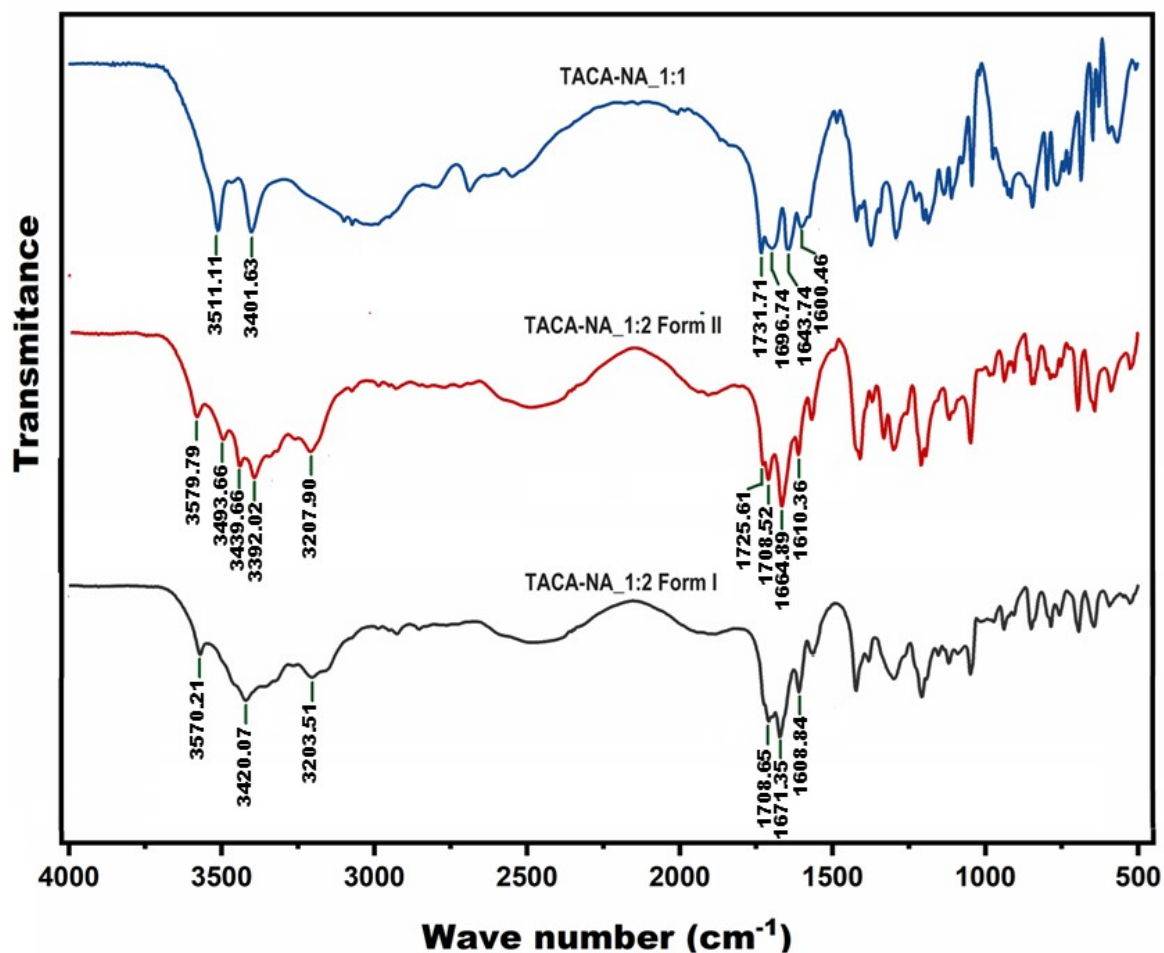

**Figure S3.** FT-IR spectra of 1:1 (TACA) $\cdot$ (NA) $\cdot$ (H<sub>2</sub>O) salt hydrate, 1:2 (TACA)<sub>2</sub> $\cdot$ (NA)<sub>4</sub> $\cdot$ (H<sub>2</sub>O) Form I and 1:2 (TACA)<sub>2</sub> $\cdot$ (NA)<sub>4</sub> $\cdot$ (H<sub>2</sub>O) Form II cocrystals.

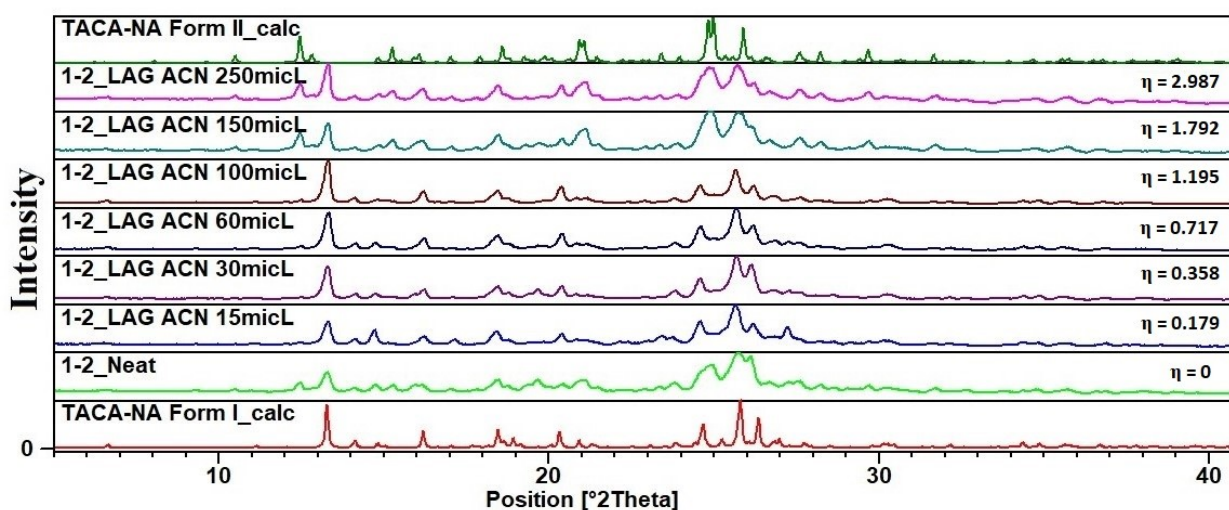



**Figure S4.** PXRD pattern of 1:2 TACA-NA mixture ground in presence of different amount of ACN. Formation of concomitant mixture (Form I and II) above  $\eta$  value of 1.196 was confirmed based on presence of  $2\theta$  peak at 12.5 characteristic of Form II.

### 3. PXRDs of all the TACA-NA multicomponent solids in turnover experiments

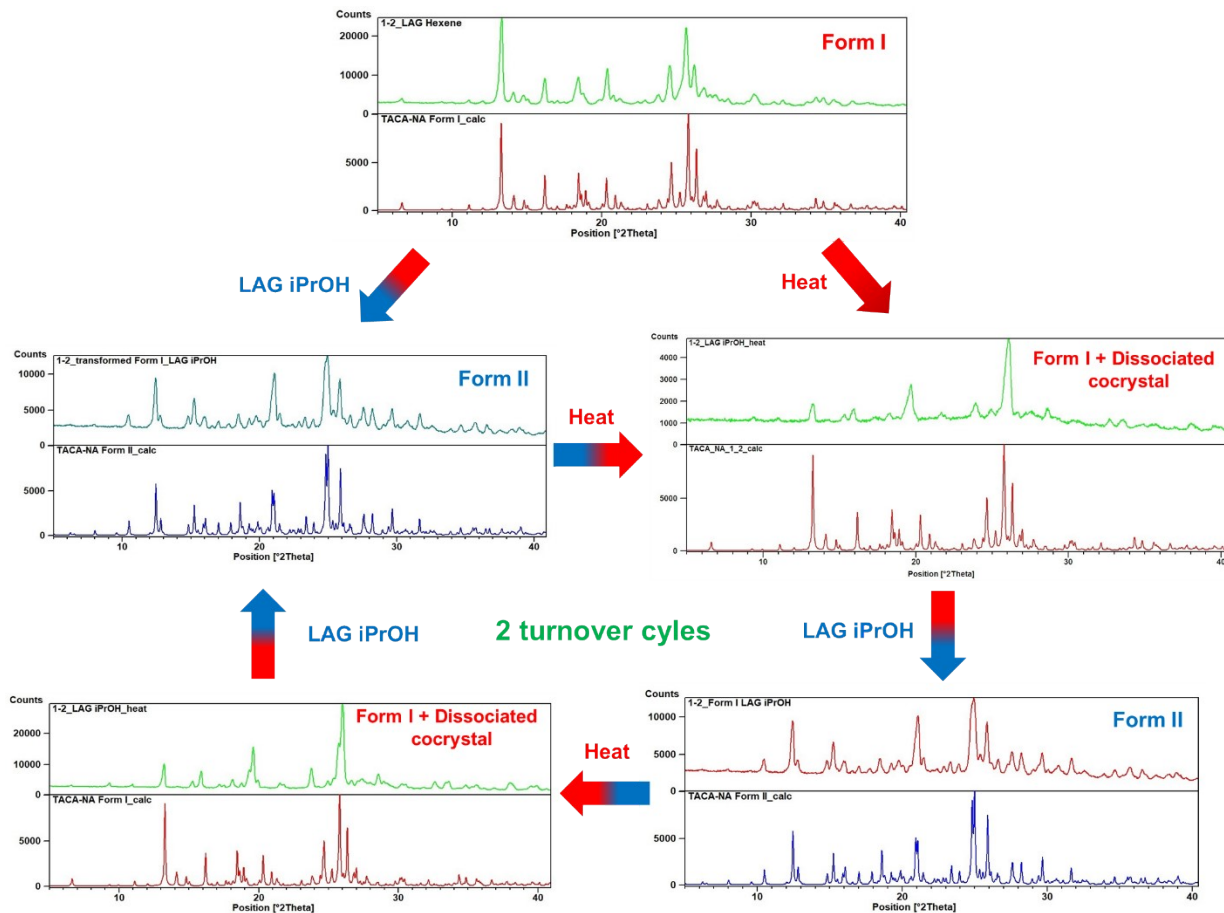

**Figure S5.** PXRD pattern showing the interconvertible nature of Form I and Form II of  $(\text{TACA})_2 \cdot (\text{NA})_4 \cdot (\text{H}_2\text{O})$  along with dissociated cocrystal upon heating.

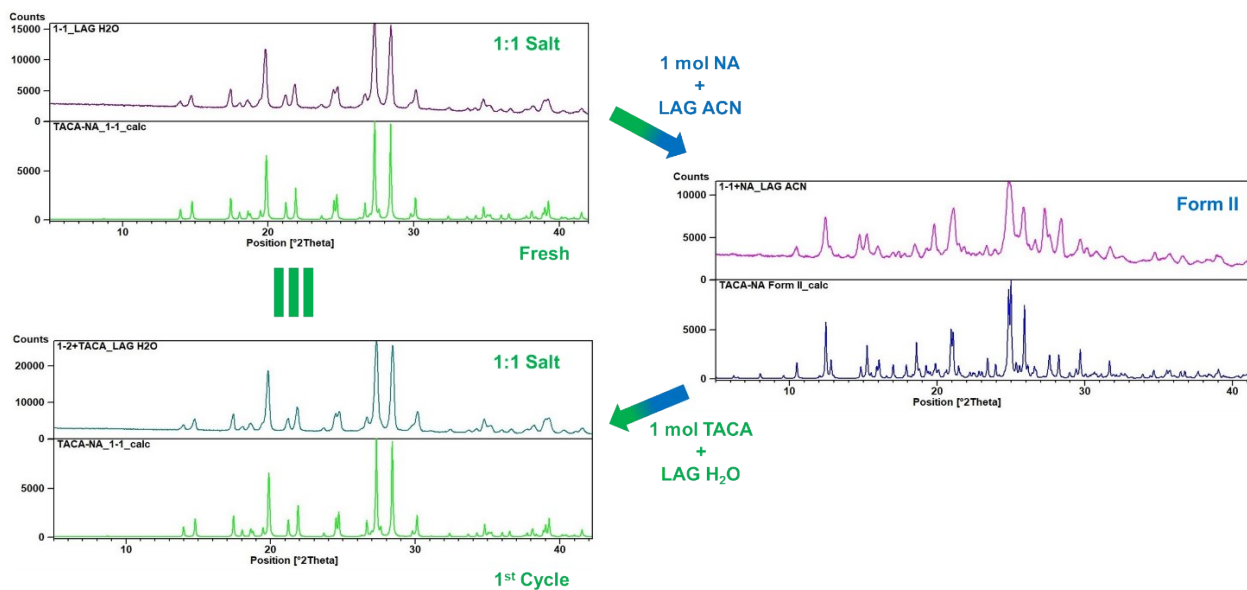

**Figure S6.** PXRD pattern showing the interconvertible nature of 1:1 molecular salt hydrate  $(TACA)^- \cdot (NA)^+ \cdot (H_2O)$  and Form II of  $(TACA)_2 \cdot (NA)_4 \cdot (H_2O)$  under specific condition mentioned in figure.

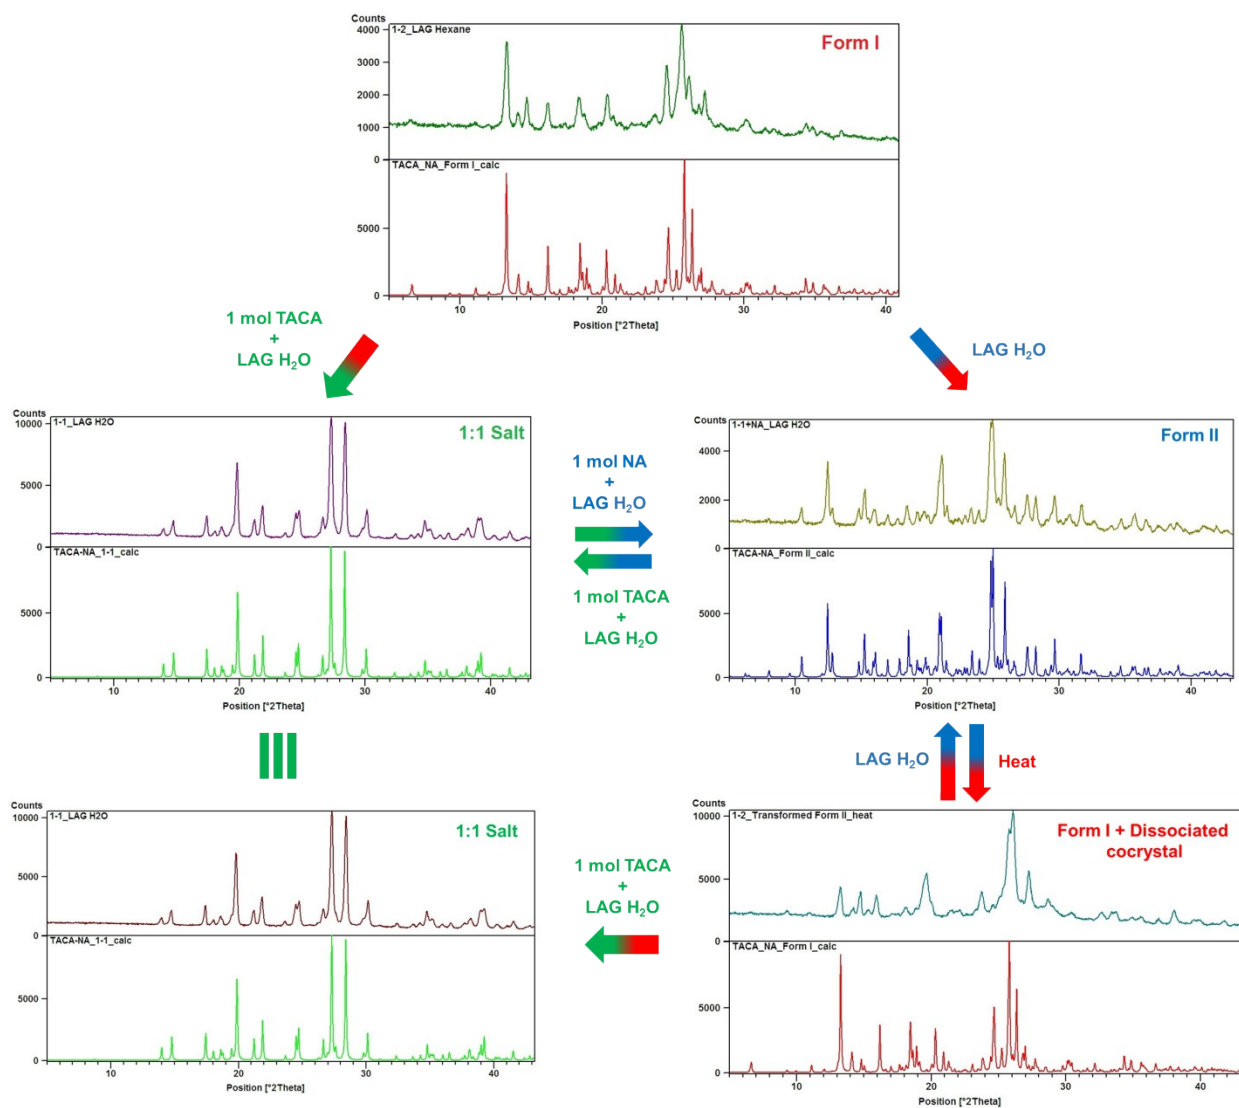

**Figure S7.** PXRD pattern showing the interconvertible nature of 1:1 molecular salt hydrate (TACA)<sup>-</sup>•(NA)<sup>+</sup>•(H<sub>2</sub>O), Form I and Form II of (TACA)<sub>2</sub>•(NA)<sub>4</sub>•(H<sub>2</sub>O) along with dissociated cocrystal upon heating. Cocystal dissociation is observed only in case of Form I showing its metastable nature compared to Form II.

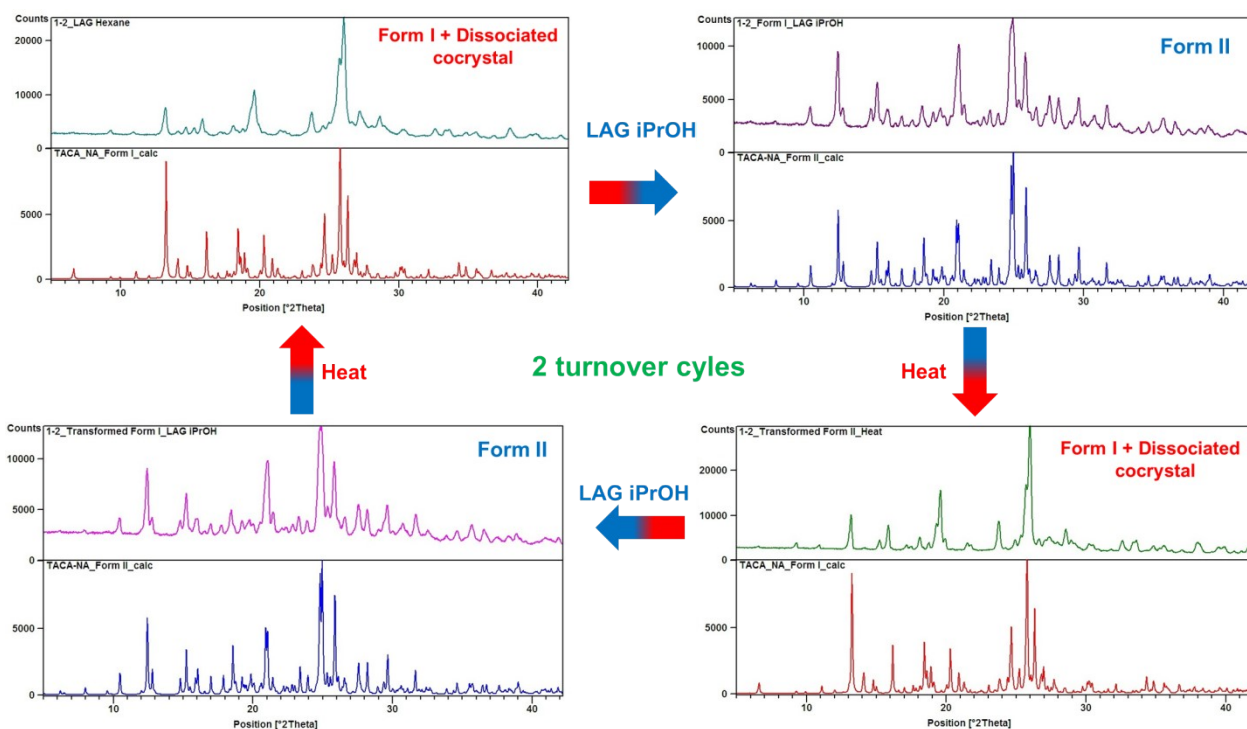

**Figure S8.** PXRD pattern showing the interconvertible nature of Form I and Form II of  $(\text{TACA})_2 \cdot (\text{NA})_4 \cdot (\text{H}_2\text{O})$  along with dissociated cocrystal upon heating. Cocrystal dissociation is observed only in case of Form I showing its metastable nature compared to Form II.

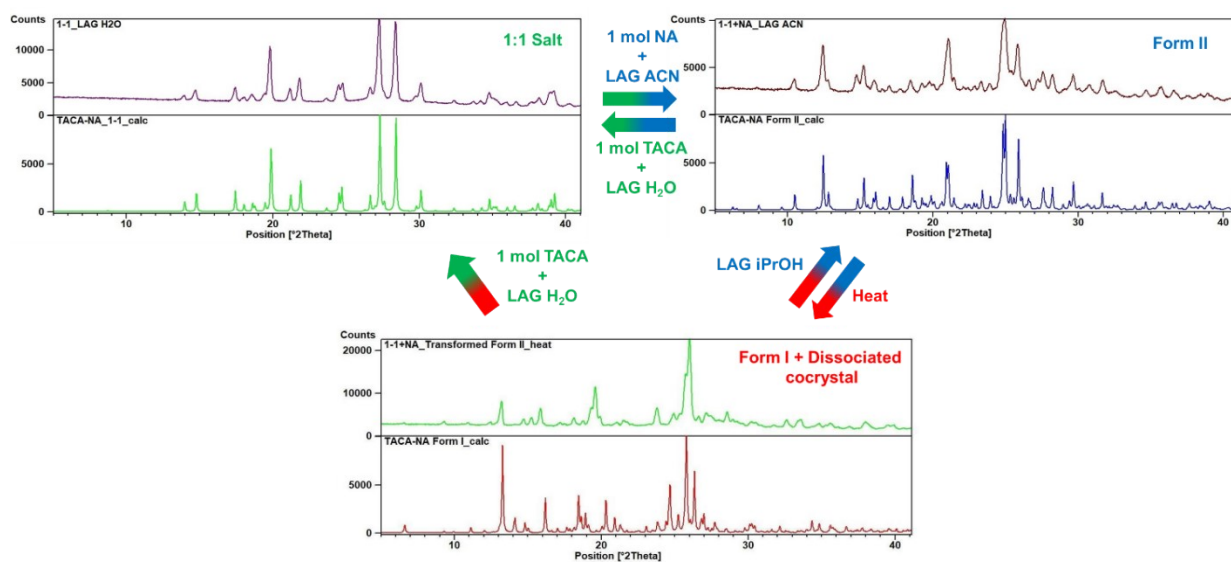

**Figure S9.** PXRD pattern showing the interconvertible nature of TACA-NA of the stoichiometric ratio 1:1 and 1:2.

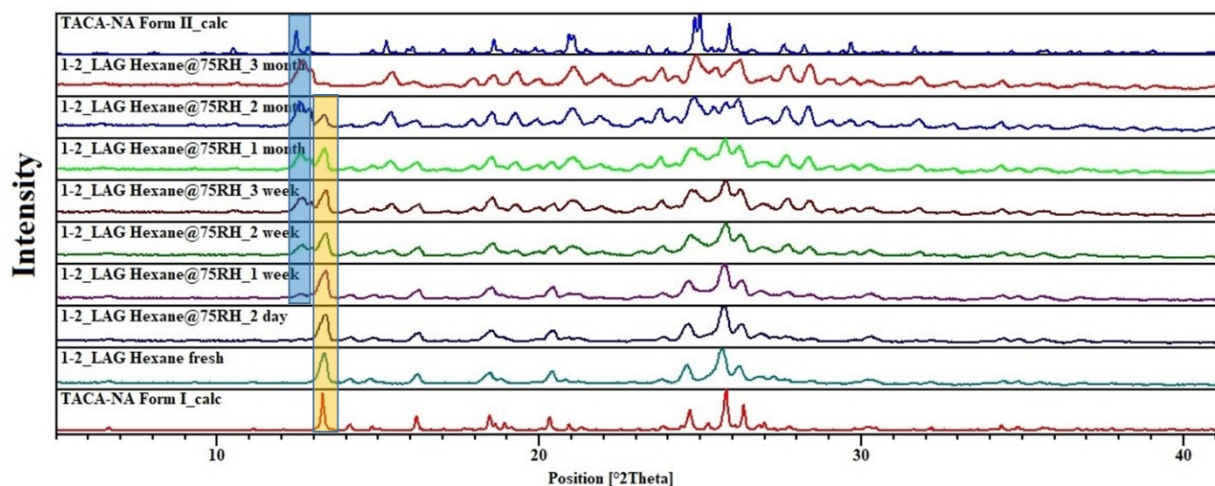

**Figure S10.** PXRD pattern of 1:2 TACA-NA Form I under 75% relative humidity placed for a period of 3 months showing polymorphic transformation from Form I to Form II. The characteristic peaks correspond to Form I and Form II are shown using yellow and blue highlights.

### Rietveld refinement

Rietveld refinement<sup>2</sup> was performed in TOPAS Academic 7.24.<sup>3</sup> The peak shape functions were defined with a pseudo-Voigt function, with the addition of a simple axial divergence model. The background was modelled with a Chebyshev polynomial function with 4 terms. The refinement involved four crystal phases, namely Forms I and II of 1:2  $(\text{TACA})_2 \cdot (\text{NA})_4 \cdot (\text{H}_2\text{O})$ , 1:1  $(\text{TACA})^- \cdot (\text{NA})^+ \cdot (\text{H}_2\text{O})$  and TACA Form I (CSD TELZOZ).<sup>4</sup> The unit cell parameters and scale factors for all the individual phases were refined, and the final composition of the mixture was expressed in weight fractions.

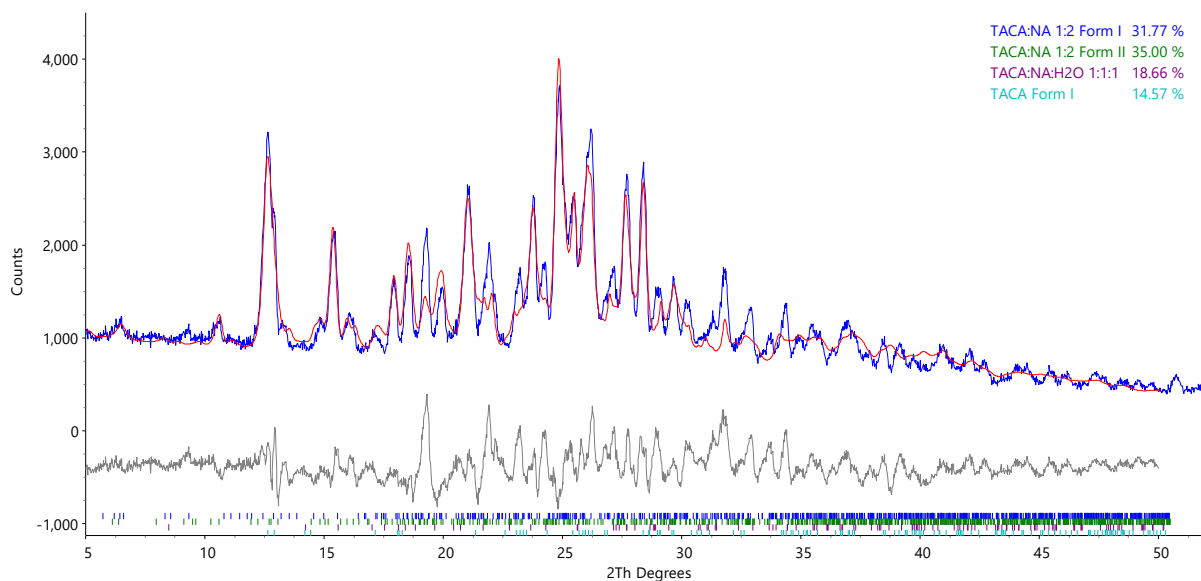

**Figure S11.** Rietveld refinement of powder pattern obtained after exposure of Form I powder sample under 75% RH for a period of 2.5 months shows transformation of Form I to Form II along with 1:1 molecular salt and starting material TACA.

Note: Broad peak and overlap of a few major peaks with Form I and Form II of  $(\text{TACA})_2 \cdot (\text{NA})_4 \cdot (\text{H}_2\text{O})$ , 1:1 molecular salt hydrate  $(\text{TACA}) \cdot (\text{NA})^+ \cdot (\text{H}_2\text{O})$  and starting material may be the reason for imperfect match during Rietveld refinement and unassigned peaks left in difference map. Several round of grinding during the turnover experiment may be the reason for partial amorphization that resulted appearance of broad peaks with relatively poor intensity during our analysis.

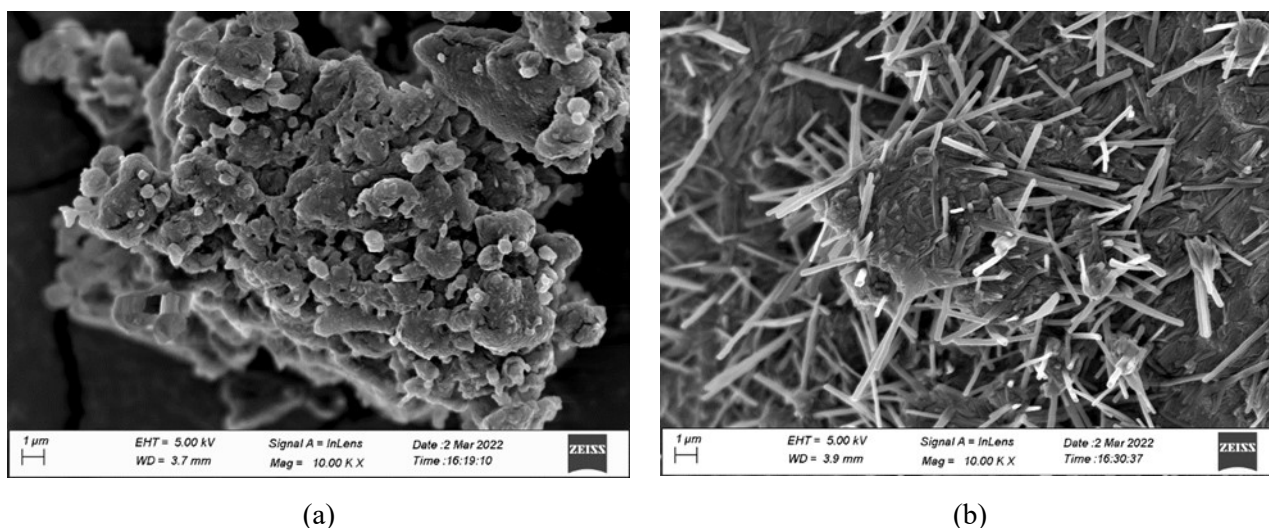

**Figure S12.** SEM images of TACA-NA (a) 1:2 transformed Form I and (b) 1:2 transformed Form II.

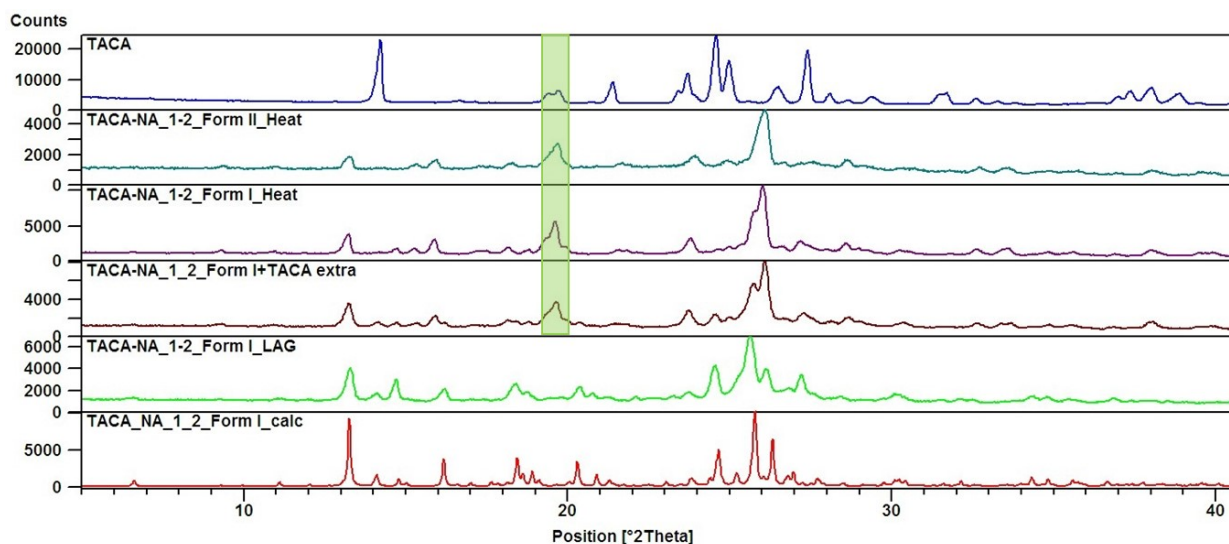

**Figure S13.** Comparison of PXRD patterns of heated 1:2 TACA-NA Form I and II, addition of trace amount of TACA in Form I cocrystal along with starting material TACA and calculated powder patterns of respective Form I, II shows appearance of new peaks corresponding to TACA highlighted in green that supports cocrystal dissociation.

#### 4. Theoretical Calculations

Important intermolecular interactions within the crystal structure of Form I and Form II are identified through Hirshfeld surface analysis using Crystal Explorer 17.<sup>5</sup> The Hirshfeld surface is defined as a set of points in 3D space where the ratio of promolecule and procrystal electron densities equals 0.5. The exploration of intermolecular contacts is provided by mapping normalized contact distances ( $d_{\text{norm}}$ ), which is a function of the closest distance from the point to the nuclei interior ( $d_i$ ) and exterior ( $d_e$ ) to the surface as well as on the van der Waals radii ( $r_{\text{vdw}}$ ).<sup>6</sup> The percentage of interactions obtained from the Hirshfeld surface analysis is visualized in the Figure S14.

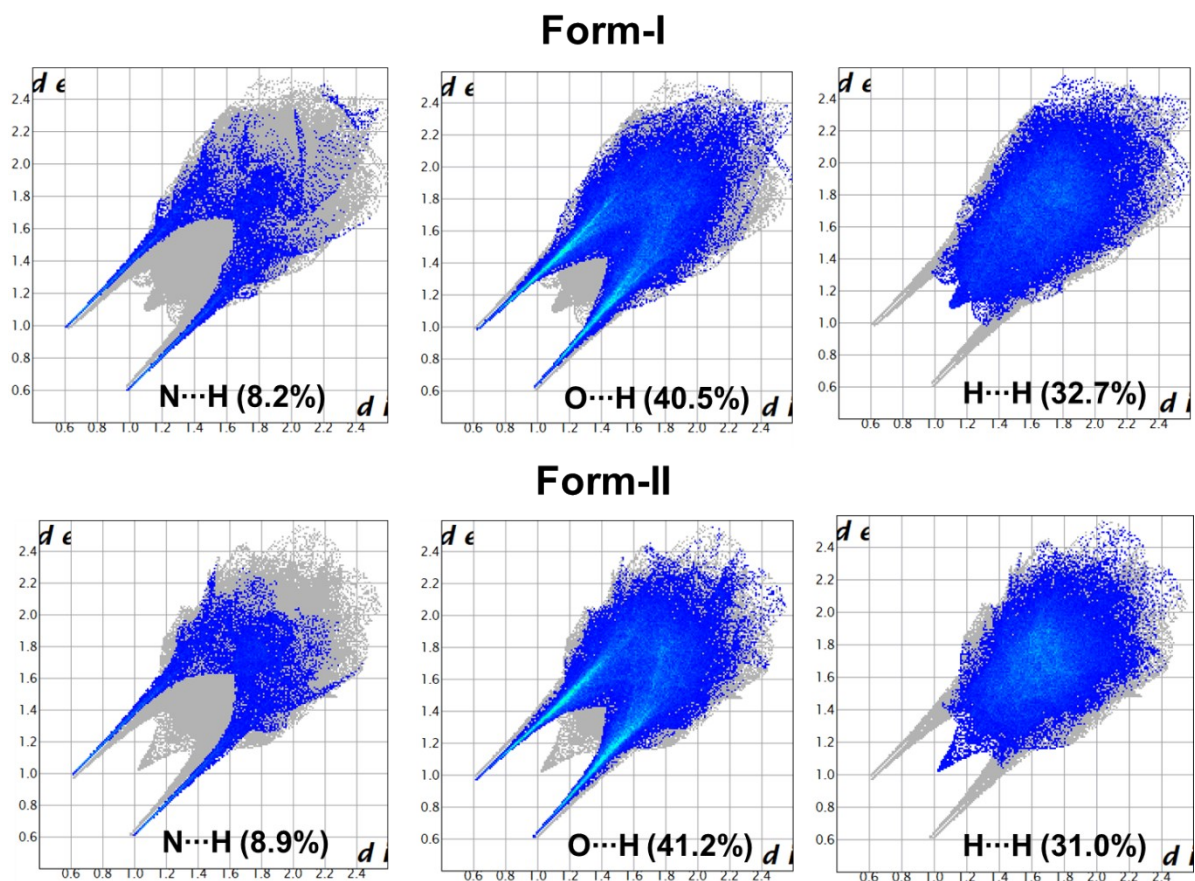

**Figure S14.** Contribution of various intermolecular interactions present in the two polymorphic forms of TACA-NA cocrystal hydrate based on Hirshfeld surface analysis.

For pK<sub>a</sub> calculations we have used Density Functional Theory to optimize the geometries at wb97xd/6-311++G\*\* level of theory and employing ultrafine numerical integration grid (pruned 99,590). To optimize the solvated counterparts, the effect of solvent polarity is considered using the SMD [scrf = (smd, solvent=water)] implicit continuum solvation model as implemented in Gaussian16.<sup>7</sup> The pK<sub>a</sub> values are calculated following the protocol described in literature.<sup>8,9</sup>

Packing energies for polymorphs (with normalized H-atom positions) were obtained after geometry optimization performed using the Forcite module of Materials studio (version 7.0) software using Dreiding force field with Gasteiger atomic charges. The unit cell parameters and motion groups were kept fixed during optimization. The invariant valence terms are ignored and only the packing energies were obtained after optimization. Valence terms for unit cell contents (with normalized H-atom positions) were obtained separately using more accurate Gaussian09 computations and added to packing energies for computing the final stability differences between polymorphs.



The lattice energy values are calculated at B3LYP-GD3/Def2TZVP level of theory. The dispersion parameter GD3 is employed since it is capable of describing the dispersion effects in molecules as well as aggregates.

**Non-covalent interactions (NCI) plot:** As non-covalent interactions predominantly govern the molecular arrangement and stability in the organic molecular system, we tried to address this by qualitatively visualizing different non-covalent interactions in both Form I and Form II. We visualized the NCI plot using the open-source code VMD<sup>6</sup> and Multiwfn.<sup>7</sup>

## 5. Optimized coordinates of the structures for p*K*<sub>a</sub> calculations

### a) TACA (gas phase)

Sum of electronic and thermal Energies = -683.476701 a.u. = -428881.6299 kCalmol<sup>-1</sup>

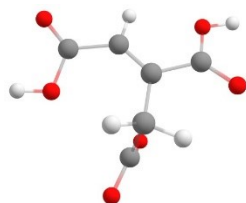

18

C<sub>6</sub>H<sub>6</sub>O<sub>6</sub>

|   |              |              |              |
|---|--------------|--------------|--------------|
| C | -0.230317000 | -1.989610000 | -0.084398000 |
| O | -0.818847000 | -2.990463000 | 0.215492000  |
| O | 0.154897000  | -1.715771000 | -1.342216000 |
| H | -0.128951000 | -2.453286000 | -1.895494000 |
| C | 0.202875000  | -0.930851000 | 0.907121000  |
| H | 1.096536000  | -1.326278000 | 1.396961000  |
| H | -0.586119000 | -0.859185000 | 1.652159000  |
| C | 0.535768000  | 0.410375000  | 0.312912000  |
| C | 2.005059000  | 0.664179000  | 0.136123000  |
| O | 2.859349000  | -0.100835000 | 0.500398000  |
| O | 2.286555000  | 1.827320000  | -0.467391000 |

|   |              |             |              |
|---|--------------|-------------|--------------|
| H | 3.246553000  | 1.891740000 | -0.527331000 |
| C | -0.328249000 | 1.363718000 | -0.050951000 |
| H | 0.042386000  | 2.303188000 | -0.439526000 |
| C | -1.808109000 | 1.318139000 | 0.016711000  |
| O | -2.498197000 | 2.290369000 | -0.142384000 |
| O | -2.315715000 | 0.095828000 | 0.251401000  |
| H | -3.276895000 | 0.176543000 | 0.265725000  |

**b) TACA (SMD=water)**

Sum of electronic and thermal Energies = -683.507353 a.u. = -428900.864 kCalmol<sup>-1</sup>

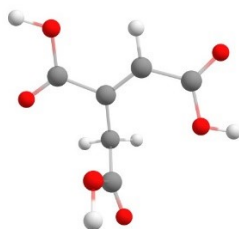

18

C<sub>6</sub>H<sub>6</sub>O<sub>6</sub>

|   |              |              |              |
|---|--------------|--------------|--------------|
| C | 0.059266000  | 1.998713000  | 0.009069000  |
| O | -0.389199000 | 3.070660000  | -0.334731000 |
| O | 0.465766000  | 1.750339000  | 1.252701000  |
| H | 0.342294000  | 2.545834000  | 1.791067000  |
| C | 0.246210000  | 0.842050000  | -0.940018000 |
| H | 1.120263000  | 1.094109000  | -1.546217000 |
| H | -0.614081000 | 0.831245000  | -1.606866000 |
| C | 0.454632000  | -0.498500000 | -0.292895000 |
| C | 1.884668000  | -0.907891000 | -0.112870000 |
| O | 2.813894000  | -0.174540000 | -0.374570000 |
| O | 2.046997000  | -2.138272000 | 0.366503000  |

|   |              |              |              |
|---|--------------|--------------|--------------|
| H | 2.993651000  | -2.314499000 | 0.464393000  |
| C | -0.511348000 | -1.323068000 | 0.120915000  |
| H | -0.263862000 | -2.294165000 | 0.530472000  |
| C | -1.970426000 | -1.081600000 | 0.029520000  |
| O | -2.765060000 | -1.992022000 | -0.082647000 |
| O | -2.330209000 | 0.195747000  | 0.105045000  |
| H | -3.293795000 | 0.263966000  | 0.026409000  |

**c) TACA-Anion (gas phase)**

Sum of electronic and thermal Energies = -682.954412 a.u. = -428553.8935 kcalmol<sup>-1</sup>

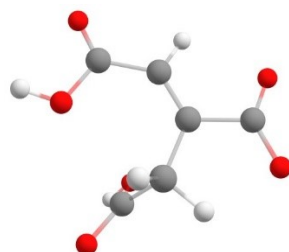

17

C<sub>6</sub>H<sub>5</sub>O<sub>6</sub>

|   |              |              |              |
|---|--------------|--------------|--------------|
| C | -0.799338000 | 1.769346000  | 0.109361000  |
| O | -1.576389000 | 2.609267000  | -0.279487000 |
| O | -0.695944000 | 1.471649000  | 1.418420000  |
| H | -1.329378000 | 2.039875000  | 1.869914000  |
| C | 0.172585000  | 1.030840000  | -0.762972000 |
| H | 1.029639000  | 1.701565000  | -0.911382000 |
| H | -0.320839000 | 0.888132000  | -1.725259000 |
| C | 0.763078000  | -0.250624000 | -0.238535000 |
| C | 2.321425000  | -0.239213000 | -0.030881000 |
| O | 2.867570000  | 0.840745000  | -0.337053000 |

|   |              |              |              |
|---|--------------|--------------|--------------|
| O | 2.816050000  | -1.291645000 | 0.399171000  |
| C | 0.096982000  | -1.382400000 | 0.027636000  |
| H | 0.679973000  | -2.219988000 | 0.393332000  |
| C | -1.337797000 | -1.637952000 | -0.080615000 |
| O | -1.887141000 | -2.670122000 | 0.242638000  |
| O | -2.071090000 | -0.614205000 | -0.592062000 |
| H | -2.985459000 | -0.915082000 | -0.583593000 |

**d) TACA-Anion (SMD=water)**

Sum of electronic and thermal Energies = -683.0664 a.u. = -428624.166 kCalmol<sup>-1</sup>

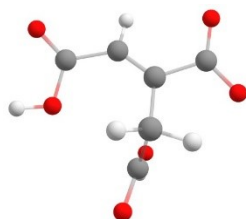

17

C<sub>6</sub>H<sub>5</sub>O<sub>6</sub>

|   |              |              |              |
|---|--------------|--------------|--------------|
| C | 0.106869000  | 1.954563000  | -0.004957000 |
| O | -0.287289000 | 3.037202000  | -0.385517000 |
| O | 0.391224000  | 1.704913000  | 1.272660000  |
| H | 0.234562000  | 2.506656000  | 1.792643000  |
| C | 0.360212000  | 0.796621000  | -0.934684000 |
| H | 1.284854000  | 1.044940000  | -1.461613000 |
| H | -0.444592000 | 0.801952000  | -1.668923000 |
| C | 0.504846000  | -0.554742000 | -0.289365000 |
| C | 1.934402000  | -1.060499000 | -0.059618000 |
| O | 2.831207000  | -0.182804000 | -0.056337000 |
| O | 2.103855000  | -2.289326000 | 0.122681000  |

|   |              |              |              |
|---|--------------|--------------|--------------|
| C | -0.509941000 | -1.328791000 | 0.110793000  |
| H | -0.293847000 | -2.310513000 | 0.514810000  |
| C | -1.951701000 | -1.033811000 | 0.039269000  |
| O | -2.799990000 | -1.904530000 | 0.112744000  |
| O | -2.266521000 | 0.256103000  | -0.091154000 |
| H | -3.228994000 | 0.344458000  | -0.146163000 |

### e) Water

Sum of electronic and thermal Energies = -76.407825 a.u. = -47945.91019 kCalmol<sup>-1</sup>

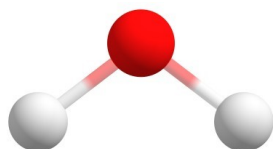

3

H<sub>2</sub>O

|   |             |              |              |
|---|-------------|--------------|--------------|
| O | 0.000000000 | 0.000000000  | 0.116281000  |
| H | 0.000000000 | -0.760662000 | -0.465124000 |
| H | 0.000000000 | 0.760662000  | -0.465124000 |

### f) Hydronium ion

Sum of electronic and thermal Energies = -76.671707 a.u. = -48111.49614 kCalmol<sup>-1</sup>

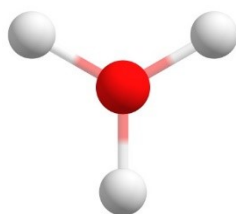

4

H<sub>3</sub>O

|   |             |             |             |
|---|-------------|-------------|-------------|
| O | 0.000000000 | 0.000000000 | 0.000000000 |
| H | 0.000000000 | 0.970369000 | 0.000000000 |

|   |              |              |             |
|---|--------------|--------------|-------------|
| H | 0.840365000  | -0.485185000 | 0.000000000 |
| H | -0.840365000 | -0.485185000 | 0.000000000 |

**g) NA (gas phase)**

Sum of electronic and thermal Energies = -416.836977 a.u. = -261565.2031 kCalmol<sup>-1</sup>

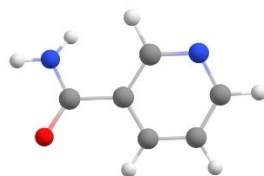

15

C<sub>6</sub>N<sub>2</sub>H<sub>6</sub>O

|   |              |              |              |
|---|--------------|--------------|--------------|
| C | 2.509394000  | -0.136098000 | 0.012259000  |
| C | 1.921287000  | 1.116199000  | 0.158757000  |
| C | 0.539914000  | 1.203544000  | 0.139804000  |
| C | -0.203667000 | 0.036364000  | -0.012355000 |
| C | 0.488484000  | -1.163013000 | -0.169834000 |
| N | 1.815846000  | -1.259714000 | -0.158143000 |
| H | 0.021809000  | 2.150610000  | 0.236019000  |
| H | 3.590386000  | -0.241339000 | 0.026135000  |
| H | 2.537931000  | 1.998113000  | 0.281905000  |
| H | -0.044368000 | -2.094834000 | -0.342707000 |
| C | -1.700854000 | 0.142448000  | -0.035149000 |
| O | -2.257888000 | 1.184266000  | -0.315970000 |
| N | -2.390763000 | -0.996270000 | 0.261641000  |
| H | -3.392966000 | -0.916992000 | 0.318773000  |
| H | -1.952616000 | -1.774470000 | 0.722252000  |

**h) NA (SMD=water)**

Sum of electronic and thermal Energies = -416.859012 a.u. = -261579.03 kCalmol<sup>-1</sup>

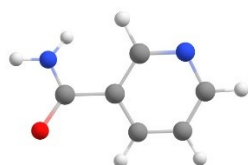

15

$C_6N_2H_6O$

|   |              |              |              |
|---|--------------|--------------|--------------|
| C | 2.508146000  | -0.134255000 | 0.002279000  |
| C | 1.922046000  | 1.109974000  | 0.191203000  |
| C | 0.540309000  | 1.199636000  | 0.178142000  |
| C | -0.204787000 | 0.037961000  | -0.007343000 |
| C | 0.479835000  | -1.160174000 | -0.195242000 |
| N | 1.810662000  | -1.256708000 | -0.195950000 |
| H | 0.040424000  | 2.150951000  | 0.317447000  |
| H | 3.588393000  | -0.234449000 | 0.006646000  |
| H | 2.540155000  | 1.985706000  | 0.343738000  |
| H | -0.059679000 | -2.084507000 | -0.375867000 |
| C | -1.698255000 | 0.126395000  | -0.036829000 |
| O | -2.258738000 | 1.163386000  | -0.406104000 |
| N | -2.382465000 | -0.957571000 | 0.352439000  |
| H | -3.391069000 | -0.929711000 | 0.333339000  |
| H | -1.929457000 | -1.772348000 | 0.734842000  |

**i) NA-H (gas phase)**

Sum of electronic and thermal Energies = -417.189178 a.u. = -261786.2092 kCalmol<sup>-1</sup>

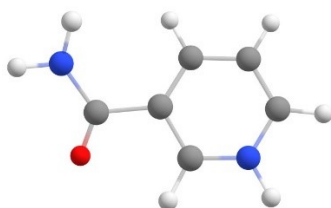

$C_6N_2H_7O$ 

|   |              |              |              |
|---|--------------|--------------|--------------|
| C | 2.521094000  | 0.046062000  | 0.007843000  |
| C | 1.849202000  | 1.235675000  | -0.140945000 |
| C | 0.454697000  | 1.232687000  | -0.139156000 |
| C | -0.246541000 | 0.039980000  | 0.011284000  |
| C | 0.475352000  | -1.133382000 | 0.139422000  |
| N | 1.814080000  | -1.094174000 | 0.142263000  |
| H | -0.073790000 | 2.169035000  | -0.280495000 |
| H | 3.599079000  | -0.042276000 | 0.019350000  |
| H | 2.409157000  | 2.152910000  | -0.263727000 |
| H | -0.012357000 | -2.097136000 | 0.223468000  |
| C | -1.756000000 | -0.128997000 | -0.032166000 |
| O | -2.202858000 | -1.213085000 | -0.326307000 |
| N | -2.497037000 | 0.964561000  | 0.241008000  |
| H | -3.500300000 | 0.854542000  | 0.233303000  |
| H | -2.124565000 | 1.790954000  | 0.676001000  |
| H | 2.319508000  | -1.968216000 | 0.241960000  |

**j) NA-H (SMD=water)**Sum of electronic and thermal Energies = -416.859012 a.u. = -261579.03 kcalmol<sup>-1</sup>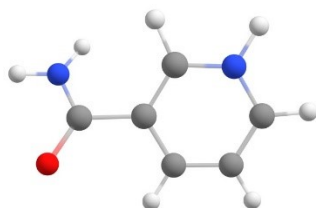



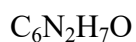

|   |              |              |              |
|---|--------------|--------------|--------------|
| C | 2.511294000  | -0.026476000 | 0.016842000  |
| C | 1.873010000  | 1.176701000  | 0.217585000  |
| C | 0.486333000  | 1.213044000  | 0.196557000  |
| C | -0.244403000 | 0.041589000  | -0.001477000 |
| C | 0.440498000  | -1.139173000 | -0.200997000 |
| N | 1.780552000  | -1.132009000 | -0.189285000 |
| H | -0.037936000 | 2.150131000  | 0.339590000  |
| H | 3.584753000  | -0.149125000 | 0.008312000  |
| H | 2.457671000  | 2.070668000  | 0.382286000  |
| H | -0.027400000 | -2.095866000 | -0.389457000 |
| C | -1.745690000 | 0.113514000  | -0.044217000 |
| O | -2.292003000 | 1.126037000  | -0.480039000 |
| N | -2.416144000 | -0.950291000 | 0.406801000  |
| H | -3.425388000 | -0.934602000 | 0.380208000  |
| H | -1.958709000 | -1.738030000 | 0.839484000  |
| H | 2.265928000  | -2.010572000 | -0.348487000 |

### Supporting Information References

1. B. Golec, P. Das, M. Bahou and Y.-P. Lee, *J. Phys. Chem. A*, **2013**, 117, 50, 13680–13690.
2. H. M. Rietveld, *J. Appl. Cryst.* **1969**, 2, 65-71.
3. A. A. Coelho, *J. Appl. Cryst.* **2018**, 51, 210-218.
4. N. Nagel, U. Endruschat, H. Bock, *Acta Crystallogr. Section C*, **1996**, 52, 2912-2915.
5. M. J. Turner, J. J. McKinnon, S. K. Wolff, D. J. Grimwood, P. R. Spackman, D. Jayatilaka, & M. A. Spackman, CrystalExplorer<sup>17</sup> (**2017**). University of Western Australia. <http://hirshfeldsurface.net>
6. M. A. Spackman and D. Jayatilaka, *CrystEngComm*, **2009**, 11, 19-32.

7. Gaussian 16, Revision B.01, M. J. Frisch, G. W. Trucks, H. B. Schlegel, G. E. Scuseria, M. A. Robb, J. R. Cheeseman, G. Scalmani, V. Barone, G. A. Petersson, H. Nakatsuji, X. Li, M. Caricato, A. V. Marenich, J. Bloino, B. G. Janesko, R. Gomperts, B. Mennucci, H. P. Hratchian, J. V. Ortiz, A. F. Izmaylov, J. L. Sonnenberg, D. Williams-Young, F. Ding, F. Lipparini, F. Egidi, J. Goings, B. Peng, A. Petrone, T. Henderson, D. Ranasinghe, V. G. Zakrzewski, J. Gao, N. Rega, G. Zheng, W. Liang, M. Hada, M. Ehara, K. Toyota, R. Fukuda, J. Hasegawa, M. Ishida, T. Nakajima, Y. Honda, O. Kitao, H. Nakai, T. Vreven, K. Throssell, J. A. Montgomery, Jr., J. E. Peralta, F. Ogliaro, M. J. Bearpark, J. J. Heyd, E. N. Brothers, K. N. Kudin, V. N. Staroverov, T. A. Keith, R. Kobayashi, J. Normand, K. Raghavachari, A. P. Rendell, J. C. Burant, S. S. Iyengar, J. Tomasi, M. Cossi, J. M. Millam, M. Klene, C. Adamo, R. Cammi, J. W. Ochterski, R. L. Martin, K. Morokuma, O. Farkas, J. B. Foresman, and D. J. Fox, Gaussian, Inc., Wallingford CT, **2016**.
8. Humphrey, W.; Dalke, A.; Schulten, K. VMD: Visual Molecular Dynamics. *J. Mol. Graphics*, **1996**, 14, 33-38.
9. Lu, T.; Chen, F. Multiwfn: A Multifunctional Wavefunction Analyzer. *J. Comput. Chem.* **2012**, 33, 580-592.
